# Supplementary material
Source: Springer Nature journal article supplement (https://www.springermedizin.de/resource/supplementary/12872_2011_427_MOESM1_ESM.pdf/9429964)

○ arterial dP/dtmax  
□ Ees

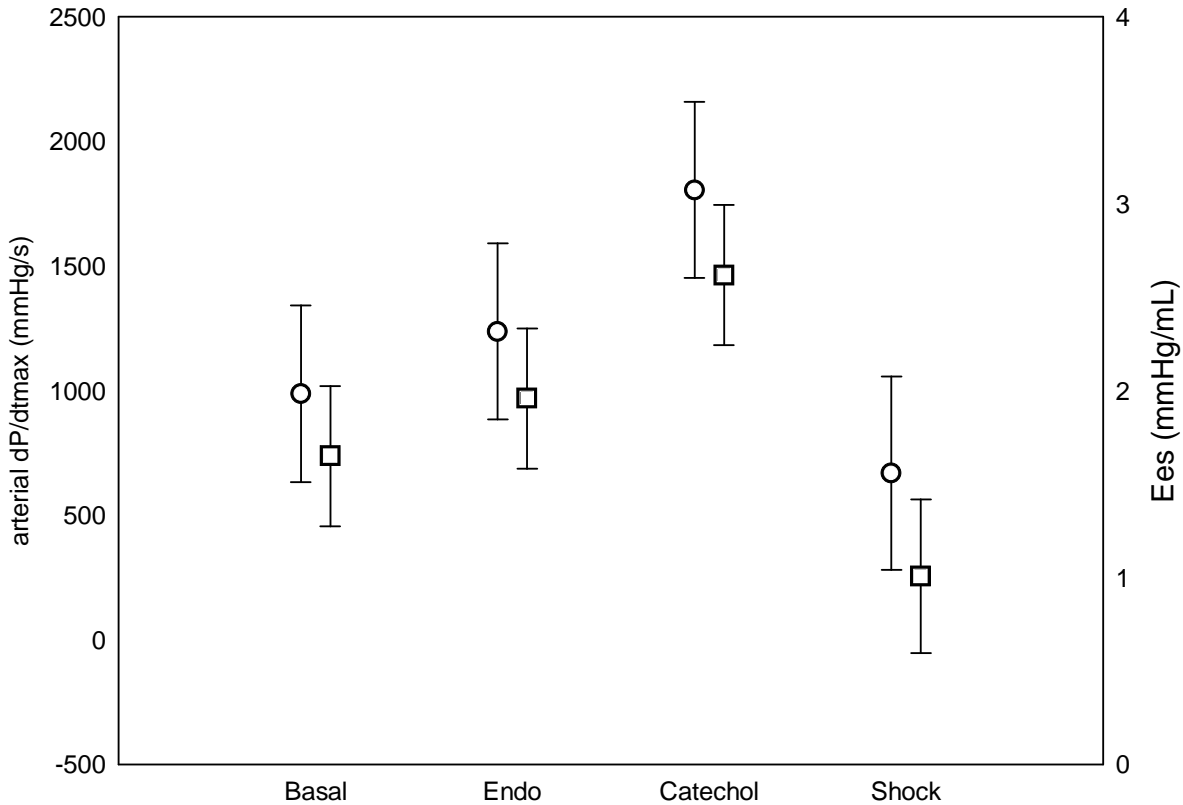

Supplement: MOESM1 [file 9429964]
